# Supplementary material
Source: HighWire-hosted journal article supplement (https://bmjopen.bmj.com/content/12/7/e055315)
Supplement: inline-supplementary-material-1 [file inline-supplementary-material-1.pdf]

## ANNEX

**Annex 1: Patients and family sociodemographic data and care seeking information, health care provider and health facility characteristics**

| Children & care-seeking                        | ALMANACH |        | Control |        | p value   | Total |        |
|------------------------------------------------|----------|--------|---------|--------|-----------|-------|--------|
|                                                | n        | (%)    | n       | (%)    |           | n     | (%)    |
| <b>Pre-SARS-CoV2 (March 2020)</b>              | 343      | (61·4) | 216     | (38·6) | < 0·001 # | 559   | (100)  |
| <b>During SARS-CoV2 (Jul-Sep 2020)</b>         | 678      | (49·5) | 692     | (50·5) |           | 1370  | (100)  |
| <b>Age in months</b>                           |          |        |         |        |           |       |        |
| 2 to 5                                         | 105      | (10·3) | 101     | (11·1) | 0·02 #    | 206   | (10·7) |
| 6 – 11                                         | 140      | (13·7) | 118     | (13·0) |           | 258   | (13·4) |
| 12 – 23                                        | 256      | (25·1) | 213     | (23·5) |           | 469   | (24·3) |
| 24 – 59                                        | 508      | (49·8) | 453     | (49·9) |           | 961   | (49·8) |
| Unknown                                        | 12       | (1·2)  | 23      | (2·5)  |           | 35    | (1·8)  |
| <b>Sex</b>                                     |          |        |         |        |           |       |        |
| Female                                         | 483      | (47·3) | 456     | (50·2) | 0·02 #    | 939   | (48·7) |
| Male                                           | 526      | (51·5) | 429     | (47·3) |           | 955   | (49·5) |
| Unknown                                        | 12       | (1·2)  | 23      | (2·5)  |           | 35    | (1·8)  |
| <b>Presenting symptoms<sup>1</sup></b>         |          |        |         |        |           |       |        |
| Fever                                          | 899      | (88·1) | 783     | (86·2) | 0·23 #    | 1,682 | (87·2) |
| Cough / difficulty breathing                   | 369      | (36·1) | 312     | (34·4) | 0·41 #    | 681   | (35·3) |
| Diarrhoea                                      | 317      | (31·1) | 283     | (31·2) | 0·96 #    | 600   | (31·1) |
| Vomiting                                       | 329      | (32·2) | 264     | (29·1) | 0·14 #    | 593   | (30·8) |
| Skin                                           | 41       | (4·0)  | 55      | (6·1)  | 0·04 #    | 96    | (5·0)  |
| Other                                          | 333      | (36·7) | 371     | (36·3) | 0·88 #    | 704   | (36·5) |
| <b>Onset of symptoms prior to consultation</b> |          |        |         |        |           |       |        |
| Same or previous day                           | 265      | (26·0) | 275     | (30·3) | 0·27 #    | 540   | (28·0) |
| 2 days to < 1 week                             | 439      | (43·0) | 362     | (39·9) |           | 801   | (41·5) |
| 1 – 2 weeks                                    | 230      | (22·5) | 194     | (21·4) |           | 424   | (22·0) |
| ≥ 2 weeks                                      | 76       | (7·4)  | 63      | (6·9)  |           | 139   | (7·2)  |
| Unknown                                        | 11       | (1·1)  | 14      | (1·5)  |           | 25    | (1·3)  |
| <b>Treatment in last 2 weeks</b>               |          |        |         |        |           |       |        |
| Yes                                            | 543      | (53·2) | 521     | (57·4) | 0·05 #    | 1064  | (55·2) |
| No                                             | 474      | (46·4) | 379     | (41·7) |           | 853   | (44·2) |
| Unknown                                        | 4        | (0·4)  | 8       | (0·9)  |           | 12    | (0·6)  |
| <b>Source of previous treatment</b>            |          |        |         |        |           |       |        |
| Same facility                                  | 31       | (3·0)  | 56      | (6·2)  | 0·05 #    | 87    | (4·5)  |
| Other facility                                 | 31       | (3·0)  | 21      | (2·3)  |           | 52    | (2·7)  |
| Pharmacy / patent medicine store               | 440      | (43·1) | 397     | (43·7) |           | 837   | (43·4) |
| Traditional healer                             | 22       | (2·2)  | 27      | (3·0)  |           | 49    | (4·5)  |
| Informal (drug peddler / other)                | 15       | (1·5)  | 13      | (1·4)  |           | 28    | (1·5)  |
| Friend relatives/community                     | 4        | (0·4)  | 7       | (0·8)  |           | 11    | (1·0)  |
| Unknown                                        | 478      | (46·8) | 387     | (42·6) |           | 865   | (44·8) |
| <b>Reported travel time to facility</b>        |          |        |         |        |           |       |        |
| < 30 minutes                                   | 696      | (68·2) | 770     | (84·8) | < 0·001 # | 1,466 | (76·0) |
| ≥ 30 minutes                                   | 307      | (30·1) | 128     | (14·1) |           | 435   | (22·6) |
| Unknown                                        | 18       | (1·8)  | 10      | (1·1)  |           | 28    | (1·5)  |
| <b>Accompanying caregiver</b>                  |          |        |         |        |           |       |        |
| Mother                                         | 767      | (75·1) | 662     | (72·9) | 0·27 #    | 1429  | (74·1) |
| Other                                          | 254      | (24·9) | 246     | (27·1) |           | 500   | (25·9) |
| <b>Mother's educational level</b>              |          |        |         |        |           |       |        |
| No schooling                                   | 350      | (34·3) | 281     | (31·0) | 0·31 #    | 631   | (32·7) |
| Primary                                        | 124      | (12·1) | 134     | (14·8) |           | 258   | (13·4) |
| Secondary                                      | 252      | (24·7) | 212     | (23·4) |           | 464   | (24·1) |
| Higher                                         | 38       | (3·7)  | 34      | (3·7)  |           | 72    | (3·7)  |
| Unknown                                        | 257      | (25·2) | 247     | (27·2) |           | 504   | (26·1) |
| <b>No. children &lt;5 in household</b>         |          |        |         |        |           |       |        |
| 1 – 2                                          | 643      | (63·0) | 617     | (68·0) | < 0·001 # | 1260  | (65·3) |
| 3 – 4                                          | 211      | (20·7) | 211     | (23·2) |           | 424   | (21·9) |
| ≥ 5                                            | 110      | (10·8) | 77      | (8·5)  |           | 187   | (9·7)  |
| Unknown                                        | 57       | (5·6)  | 3       | (0·3)  |           | 60    | (3·1)  |
| <b>Health care providers</b>                   |          |        |         |        |           |       |        |
| 144                                            | (48·5)   | 153    | (51·5)  |        | 297       | (100) |        |
| <b>Qualification</b>                           |          |        |         |        |           |       |        |
| CHEW / CHO                                     | 71       | (49·3) | 67      | (43·8) |           | 138   | (46·5) |

|                                                                       |    |        |     |        |        |     |        |
|-----------------------------------------------------------------------|----|--------|-----|--------|--------|-----|--------|
| Junior CHEW                                                           | 37 | (25·7) | 31  | (20·3) |        | 68  | (22·9) |
| Nurse / midwife                                                       | 2  | (1·4)  | 4   | (2·6)  | 0·35 # | 6   | (2·0)  |
| Other                                                                 | 34 | (23·6) | 51  | (33·4) |        | 85  | (28·6) |
| <b>Years of experience consulting children under 5 years (period)</b> |    |        |     |        |        |     |        |
| <1 year (2020)                                                        | 4  | (2·8)  | 5   | (3·3)  |        | 9   | (3·0)  |
| 1 – 4 years (2016-2019)                                               | 36 | (25·0) | 44  | (28·8) | 0·76 # | 80  | (26·9) |
| ≥ 5 years ago (prior to 2016)                                         | 91 | (63·2) | 90  | (58·8) |        | 181 | (60·9) |
| Unknown                                                               | 13 | (9·0)  | 14  | (9·2)  |        | 27  | (9·1)  |
| <b>HCPs' last IMCI training (date)</b>                                |    |        |     |        |        |     |        |
| <1 year ago (2020)                                                    | 1  | (0·7)  | 3   | (2·0)  |        | 4   | (1·4)  |
| 1 – 2 years ago (2018, 2019)                                          | 55 | (38·2) | 41  | (26·8) |        | 96  | (32·3) |
| 3 – 4 years ago (2016, 2017)                                          | 17 | (11·8) | 22  | (14·4) | 0·45 # | 39  | (13·1) |
| ≥ 5 years ago (prior to 2016)                                         | 9  | (6·3)  | 13  | (8·5)  |        | 22  | (7·4)  |
| Never                                                                 | 49 | (34·0) | 60  | (39·2) |        | 109 | (36·7) |
| Unknown                                                               | 13 | (9·0)  | 14  | (9·2)  |        | 27  | (9·1)  |
| <b>Date of ALMANACH training</b>                                      |    |        |     |        |        |     |        |
| 2020                                                                  | 17 | (11·8) | 2   | (1·3)  |        | 19  | (6·4)  |
| 2019                                                                  | 90 | (62·5) | 1   | (0·7)  |        | 91  | (30·6) |
| 2018                                                                  | 6  | (4·2)  | 0   |        |        | 6   | (2·0)  |
| Never                                                                 | 31 | (21·5) | 140 | (98·0) |        | 181 | (60·9) |
| <b>Health facilities</b>                                              |    |        |     |        |        |     |        |
| <b>Distance from main road</b>                                        |    |        |     |        |        |     |        |
| < 30 minutes                                                          | 32 | (71·1) | 33  | (75·0) | 0·81 # | 65  | (73·0) |
| ≥ 30 minutes                                                          | 13 | (28·9) | 11  | (25·0) |        | 24  | (27·0) |
| <b>Distance from referral hospital</b>                                |    |        |     |        |        |     |        |
| < 30 minutes                                                          | 16 | (35·6) | 20  | (45·5) | 0·39 # | 36  | (40·5) |
| ≥ 30 minutes                                                          | 29 | (64·4) | 24  | (54·6) |        | 53  | (59·6) |
| <b>No. consultations children (U5) at facility / month</b>            |    |        |     |        |        |     |        |
| 0 – 99                                                                | 15 | (33·3) | 22  | (50·0) |        | 37  | (41·6) |
| 100 – 199                                                             | 16 | (35·6) | 15  | (34·1) | 0·19 # | 31  | (34·8) |
| ≥ 200                                                                 | 11 | (24·4) | 4   | (9·1)  |        | 15  | (16·9) |
| Unknown                                                               | 3  | (6·7)  | 3   | (6·8)  |        | 6   | (6·7)  |
| <b>Health facility power supply</b>                                   |    |        |     |        |        |     |        |
| All day (no interruptions)                                            | 7  | (15·6) | 4   | (9·1)  |        | 11  | (12·4) |
| All day (interruptions)                                               | 10 | (22·2) | 15  | (34·1) | 0·82 # | 25  | (28·1) |
| ≤ Half a day                                                          | 17 | (37·8) | 16  | (36·4) |        | 33  | (37·1) |
| No electricity source                                                 | 6  | (13·3) | 8   | (18·2) |        | 14  | (15·7) |
| Unknown                                                               | 5  | (11·1) | 1   | (2·3)  |        | 6   | (6·7)  |
| <b>Health facility water supply<sup>1</sup></b>                       |    |        |     |        |        |     |        |
| Piped                                                                 | 2  | (4·4)  | 2   | (4·6)  | 1·0 #  | 4   | (4·5)  |
| Pump / well                                                           | 33 | (73·3) | 23  | (52·3) | 0·03 # | 56  | (62·9) |
| None                                                                  | 7  | (15·6) | 18  | (40·9) | 0·01 # | 25  | (28·1) |
| Unknown                                                               | 5  | (11·1) | 1   | (2·3)  | 0·20 # | 6   | (6·7)  |
| Outages                                                               | 7  | (15·6) | 10  | (22·7) | 0·43 # | 17  | (19·1) |
| <b>Stock-outs of medicines for severe illness</b>                     |    |        |     |        |        |     |        |
| Parenteral antibiotics                                                | 10 | (22·2) | 15  | (34·1) | 0·15 # | 25  | (28·1) |
| Parenteral antimalarials                                              | 7  | (15·6) | 14  | (31·8) | 0·13 # | 21  | (23·6) |

CHEW = Community Health Extension Worker

CHO = Community Health Officer

U5 = Under five years of age

<sup>1</sup> Multiple answers possible<sup>2</sup> Other symptoms: Child is feeling very weak/not drinking/not eating; child has an ear problem; belly problem; pain; painful urination; runny nose; blood in the stool; sore throat, I don't know; other;<sup>3</sup> Other qualifications: Lab technician; EHO; medical doctor (n=1); other;

# Chi-squared test

## Fisher's exact test
